# Supplementary material for: Regulating charge carrier recombination in Cu2ZnSn(S,Se)4 solar cells via cesium treatment: bulk and interface effects
Source: Royal Society of Chemistry journal article supplement (doi:10.1039/d3ta01708g), 2023-01-01
Supplement: d3ta01708g1.pdf [file d3ta01708g1.pdf]

Supporting Information

# Regulating Charge Carrier Recombination in $\text{Cu}_2\text{ZnSn}(\text{S},\text{Se})_4$ Solar Cells via Cesium Treatment: Bulk and Interface Effects

Xiaoyue Zhao, Yafang Qi,\* Zhengji Zhou, Dongxing Kou, Wenhui Zhou, Yuena Meng, Shengjie Yuan, Litao Han, and Sixin Wu\*

The Key Laboratory for Special Functional Materials of MOE, School of Materials Science and Engineering, National & Local Joint Engineering Research Center for High-efficiency Display and Lighting Technology, Collaborative Innovation Center of Nano Functional Materials and Applications, Henan University, Kaifeng 475004, China.

Email: [qiyaofang@henu.edu.cn](mailto:qiyaofang@henu.edu.cn); [wusixin@henu.edu.cn](mailto:wusixin@henu.edu.cn)

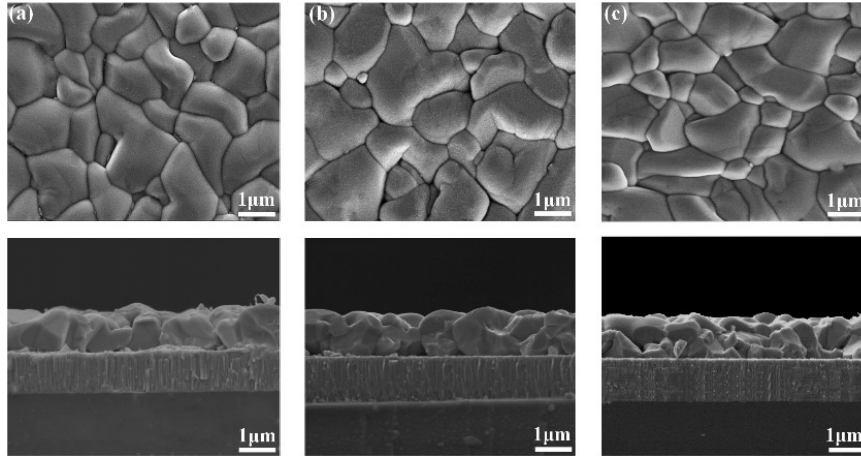

**Fig. S1** SEM top-view and cross-sectional images of the CZTSSe thin films treated with different concentrations of CsCl hot solution: (a) Reference, (b) 1.25 wt%, and (c) 2.00 wt%.

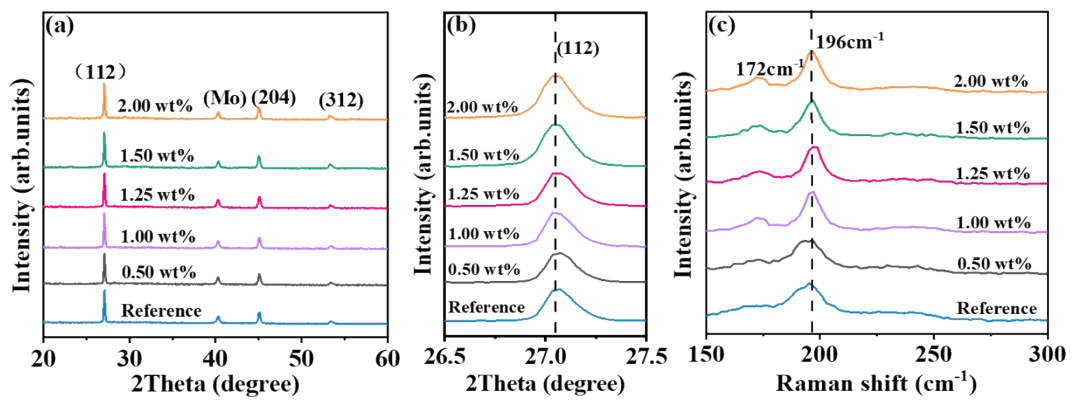

**Fig. S2** (a) X-ray diffraction (XRD) spectra, (b) the enlarged view of the (112) lattice plane, and (c) Raman spectra for the CZTSSe-based samples treated with different concentration of CsCl hot solution.

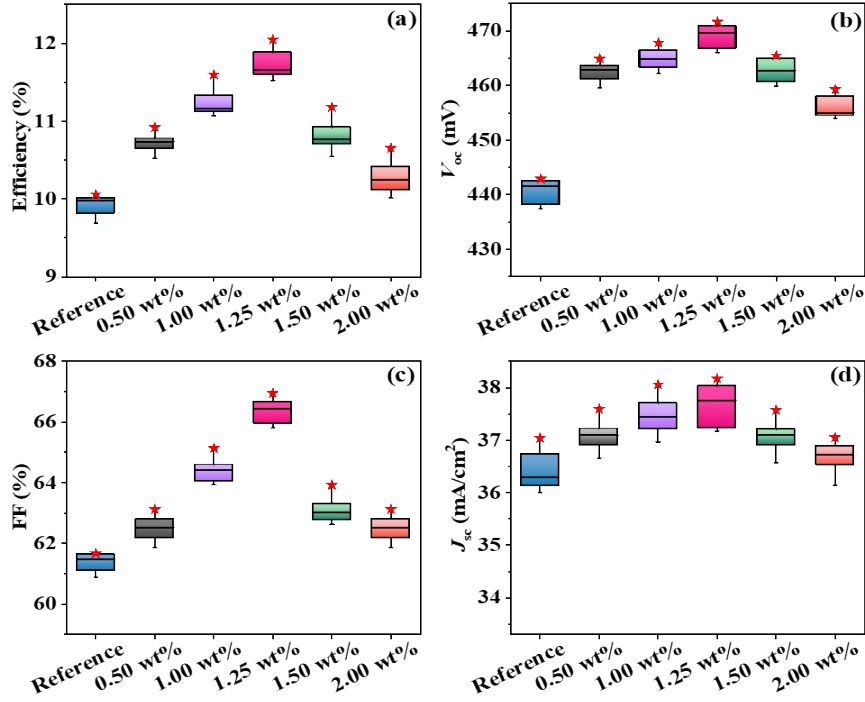

**Fig. S3** Statistical boxplots of (a) PCE, (b)  $V_{OC}$ , (c) FF, and (d)  $J_{SC}$  for the CZTSSe solar cells with the absorber films treated by different concentration of CsCl hot solution.

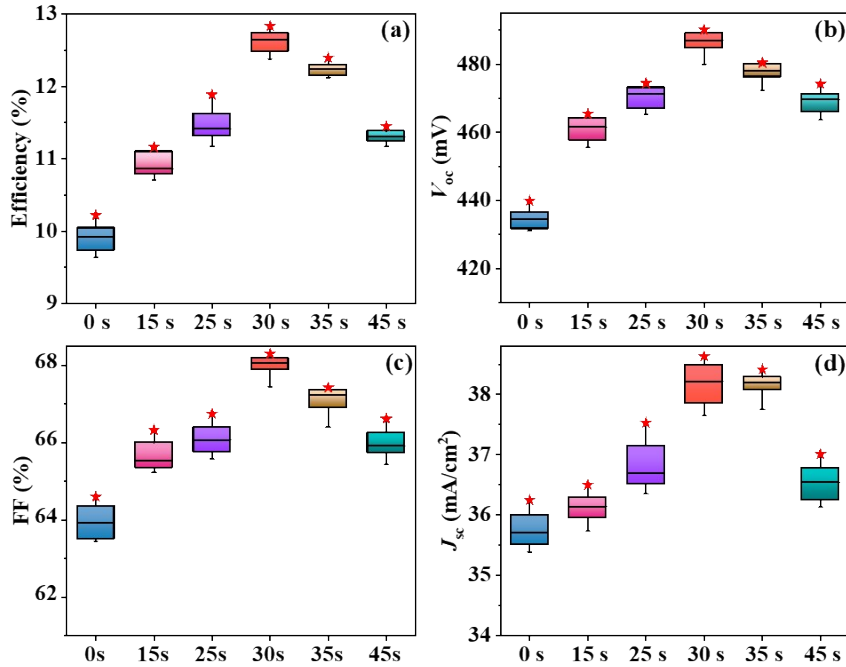

**Fig. S4** Statistical boxplots of (a) PCE, (b)  $V_{OC}$ , (c) FF, and (d)  $J_{SC}$  for the CZTSSe solar cells with the soaking time of CZTSSe absorber films varied in the range of 0–45 s.

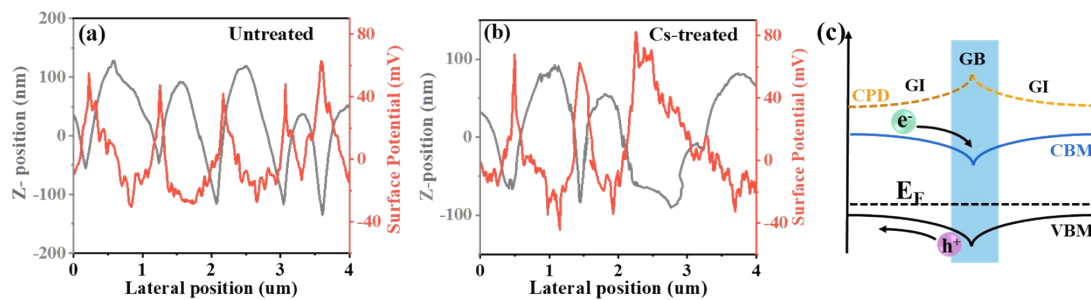

**Fig. S5** Plots of the surface topography and surface potential line profiles for the (a) untreated sample and (b) Cs-treated sample. (c) Schematic of the band diagrams across the grain boundaries (GBs).

**Table S1** Summary of the photovoltaic parameters for CZTSSe solar cells with the absorber films treated by different concentration of CsCl hot solution (0-2.00 wt%). The data are the average values calculated from 18 devices with standard deviation.

| Sample    | PCE (%)    | $V_{OC}$ (mV) | $J_{SC}$ (mA/cm <sup>2</sup> ) | FF (%)     |
|-----------|------------|---------------|--------------------------------|------------|
| Reference | 9.92±0.12  | 440.58±2.06   | 36.42±0.35                     | 61.49±0.18 |
| 0.50 wt%  | 10.71±0.10 | 462.46±1.55   | 37.06±0.26                     | 62.52±0.36 |
| 1.00 wt%  | 11.22±0.14 | 464.80±1.80   | 37.49±0.32                     | 64.39±0.35 |
| 1.25 wt%  | 11.73±0.16 | 469.01±1.95   | 37.69±0.36                     | 66.35±0.38 |
| 1.50 wt%  | 10.82±0.17 | 462.69±1.97   | 37.07±0.22                     | 63.10±0.42 |
| 2.00 wt%  | 10.27±0.18 | 456.09±1.97   | 36.62±0.32                     | 61.84±0.37 |

**Table S2** Summary of the photovoltaic parameters for CZTSSe solar cells with the soaking time of CZTSSe absorber films varied in the range of 0–45 s. The data are the average values calculated from 18 devices with standard deviation.

| Sample    | PCE (%)    | $V_{OC}$ (mV) | $J_{SC}$ (mA/cm <sup>2</sup> ) | FF (%)     |
|-----------|------------|---------------|--------------------------------|------------|
| Reference | 9.90±0.17  | 433.19±3.47   | 35.76±0.27                     | 63.96±0.40 |
| 15s       | 10.92±0.15 | 460.48±3.25   | 36.13±0.23                     | 65.66±0.37 |
| 25s       | 11.44±0.19 | 470.43±2.91   | 36.81±0.35                     | 66.08±0.36 |
| 30s       | 12.63±0.13 | 486.57±3.21   | 38.17±0.16                     | 68.01±0.25 |
| 35s       | 12.24±0.08 | 477.64±2.37   | 38.16±0.30                     | 67.11±0.29 |
| 45s       | 11.30±0.08 | 469.07±2.98   | 36.53±0.27                     | 65.97±0.34 |
